# Supplementary material for: Simultaneous Study of Anti-Ferroptosis and Antioxidant Mechanisms of Butein and (S)-Butin
Source: MDPI journal article supplement (doi:10.3390/molecules25030674), 2020-02-05

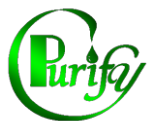

成都普瑞法科技开发有限公司  
Chengdu Biopurify Phytochemicals Ltd.

Add: No.11 Building, No. 388 Rongtaidadao CNSTP  
Wenjiang Zone, Chengdu, Sichuan, 611130 China  
TEL: 028-82633987 FAX: 028-82633165  
E-mail: biopurify@gmail.com sales@biopurify.com  
Web: www.biopurify.com

## Certificate of Analysis

**Product Name:** Butin

**Other Name:**

**Catalogue No.:** BP0074

**Batch No.:** 14100903

**Report date:** 2014-10-09

**CAS Number:** 492-14-8

**Mol. Formula:** C<sub>15</sub>H<sub>12</sub>O<sub>5</sub>

**Mol. Weight:** 272.256

**Type of compound:**

**Identification Method:** Mass, NMR

**Analysis Method of Purity:** HPLC-DAD

**Structure:**

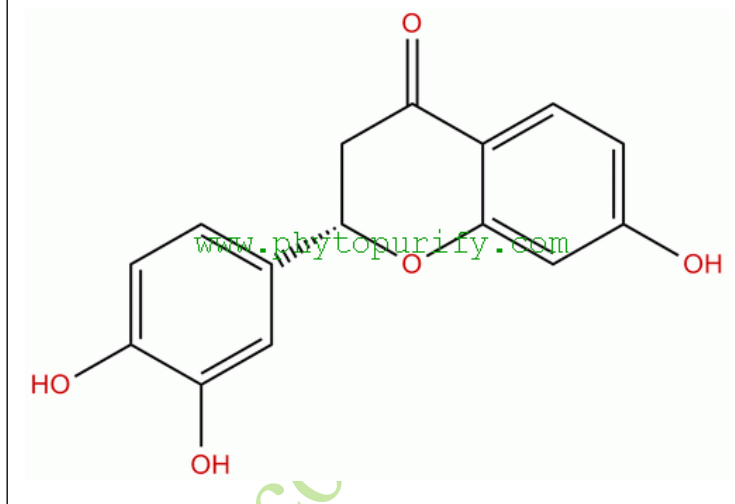

**Analytical result:**

| Test           | Specification | Results       |
|----------------|---------------|---------------|
| Appearance     | Yellow powder | Yellow powder |
| Loss on drying | <3.0%         | 1.3 %         |
| Purity (HPLC)  | ≥95.0%        | 97%           |

**Package:** Brown vial or HDPE Plastic Bottle

**Storage:** Cool and Dry place, protected from light, keep package airproofed when not in use.

**Expiration:** two years (2016-10-08) under conditions list above.

QC: Meng Pan

Date: 2014-10-09

QA: Lianglei Zhang

Date: 2014-10-09

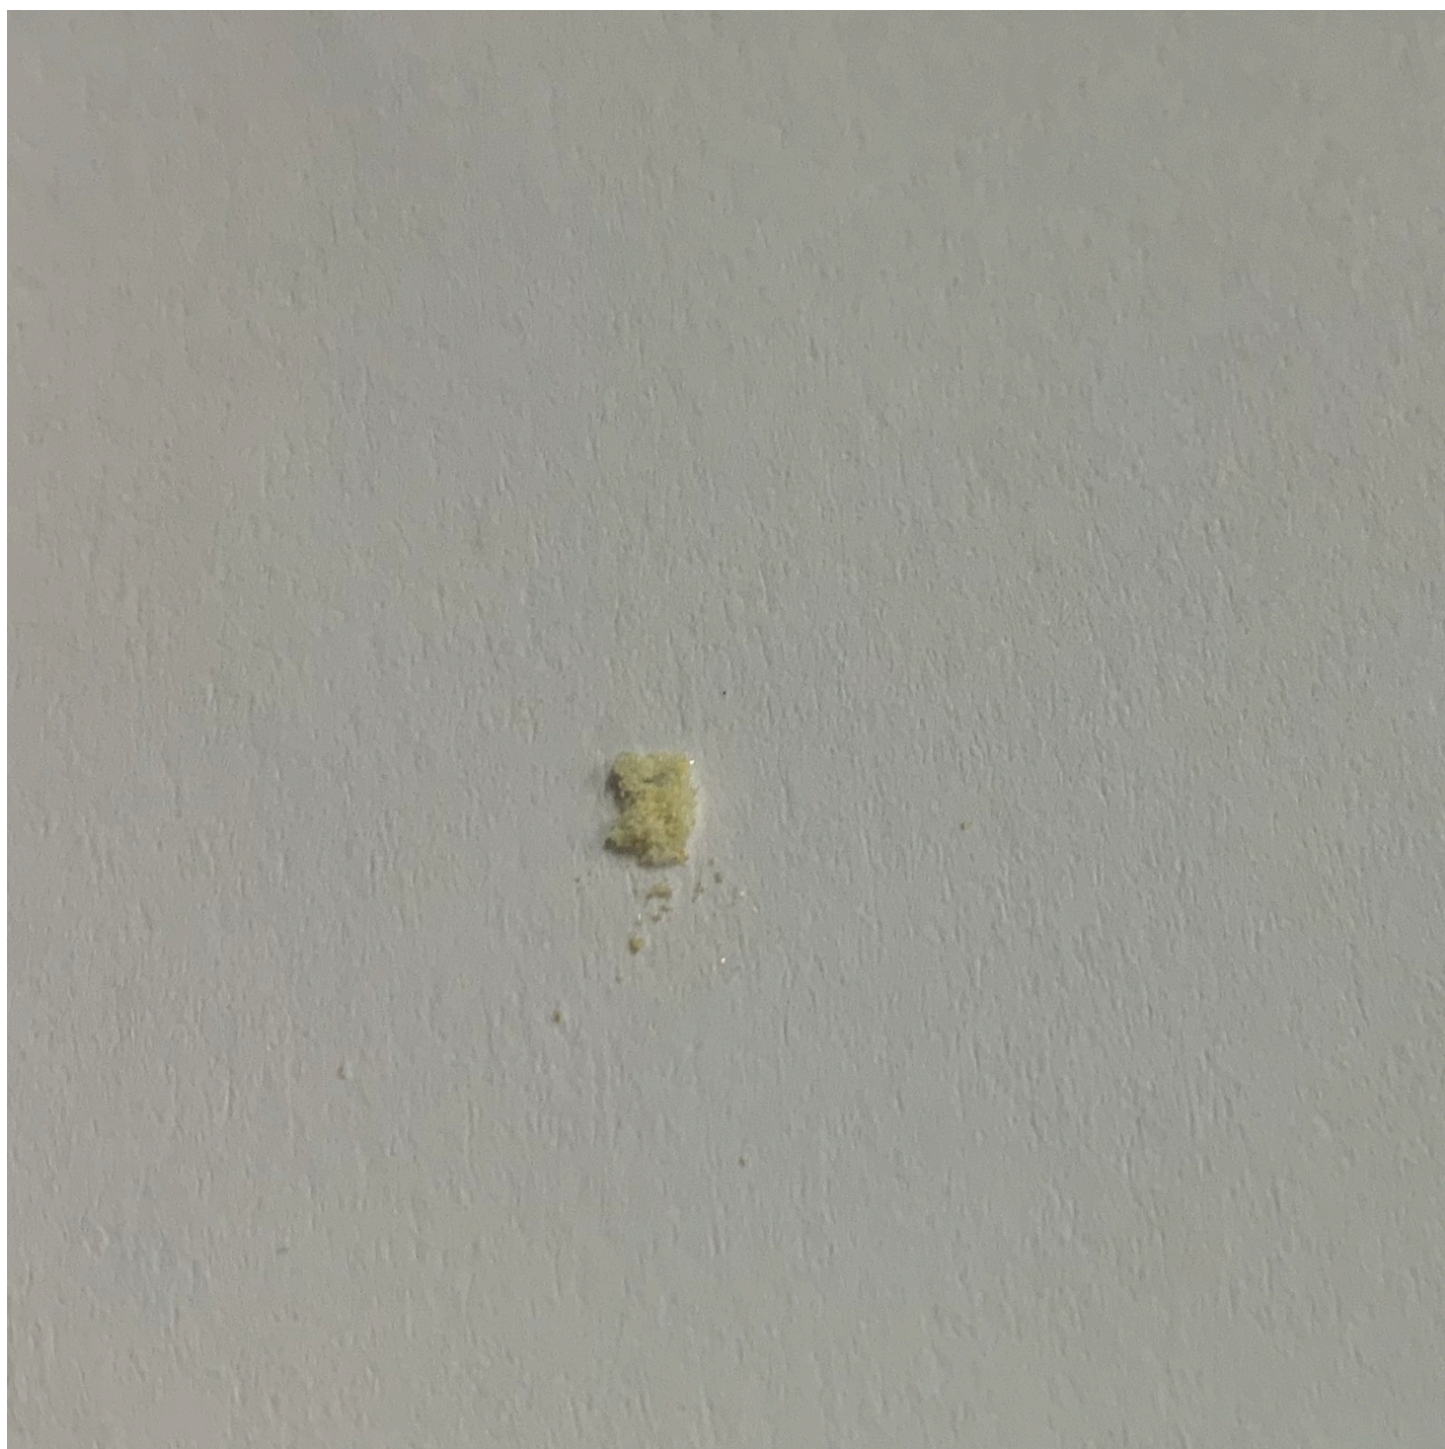

Supplement: s1 [file s1]
